# Supplementary material for: Polyunsaturated fatty acids alter the formation of lipid droplets and eicosanoid production in Leishmania promastigotes
Source: PubMed Central journal article supplement (PMC9991015; doi:10.1590/0074-02760220160), 2023-03-06
Supplement: 1678-8060-mioc-118-e220160-s.pdf [file 1678-8060-mioc-118-e220160-s.pdf]

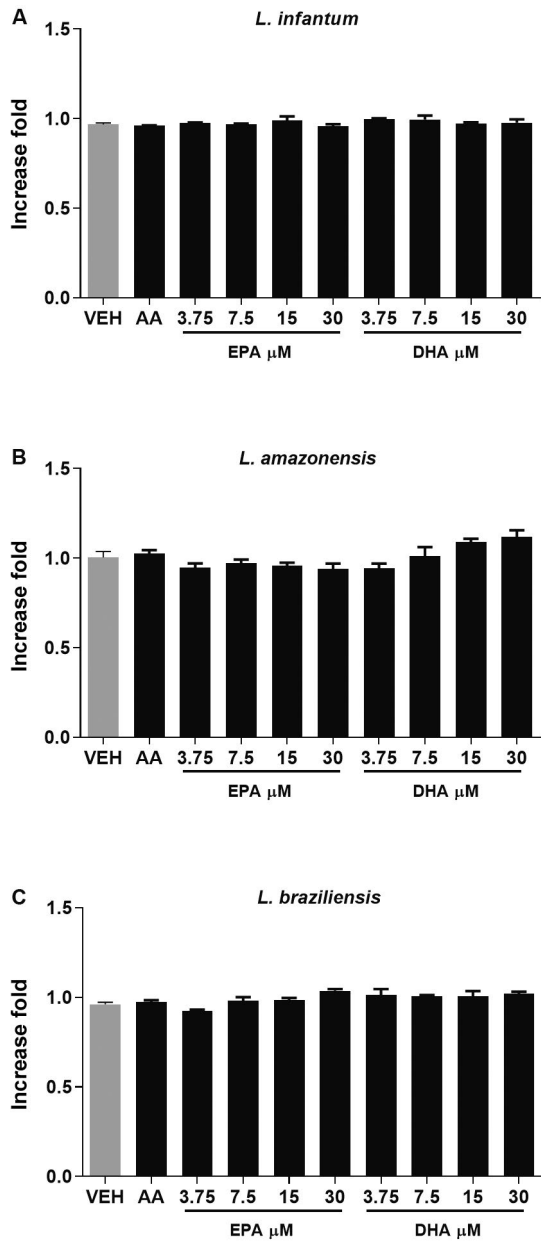

Fig. 1: polyunsaturated fatty acids stimulation does not affect *Leishmania* viability. Procyclic promastigotes of (A) *L. infantum*, (B) *L. amazonensis* and (C) *L. braziliensis* in logarithmic growth phase were stimulated with AA, EPA or DHA for 1 h. Next, tetrazolium salt (XTT) reduction was measured by spectrophotometry. Data are represented as means  $\pm$  standard error of optical density readings.

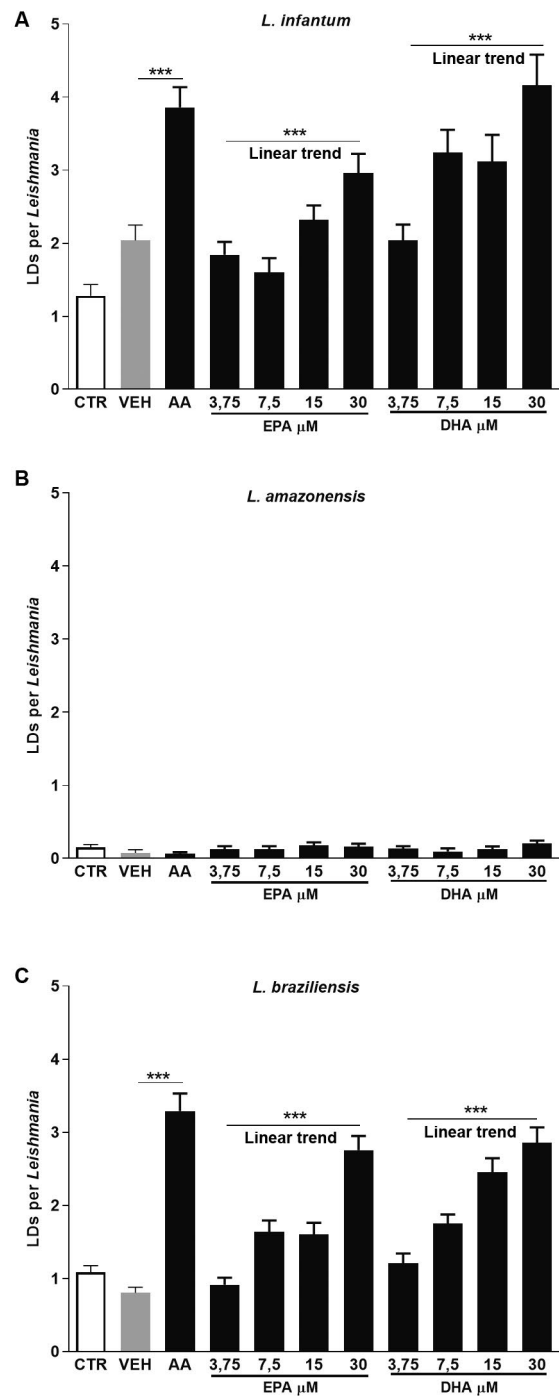

Fig. 2: polyunsaturated fatty acids increase the formation of lipid droplets in procyclic forms of *Leishmania*. Logarithmic growth phase promastigotes of (A) *L. infantum* (B) *L. amazonensis* and (C) *L. braziliensis* were stimulated with ethanol (vehicle) or AA (15  $\mu\text{M}$ ), EPA (3.75, 7.5, 15 or 30  $\mu\text{M}$ ) or DHA (3.75, 7.5, 15 or 30  $\mu\text{M}$ ) for 1 h, and then stained with Oil Red O to quantify LDs. Bars represent means  $\pm$  SEM of LDs per parasite. \*\*\* represent  $p < 0.0001$ , for pairwise comparison between AA and the vehicle using the Mann-Whitney test. The significance was tested by One-way ANOVA with post-test linear trend to dose response stimuli. AA: arachidonic acid; EPA: eicosapentaenoic acid; DHA: docosahexaenoic acid.

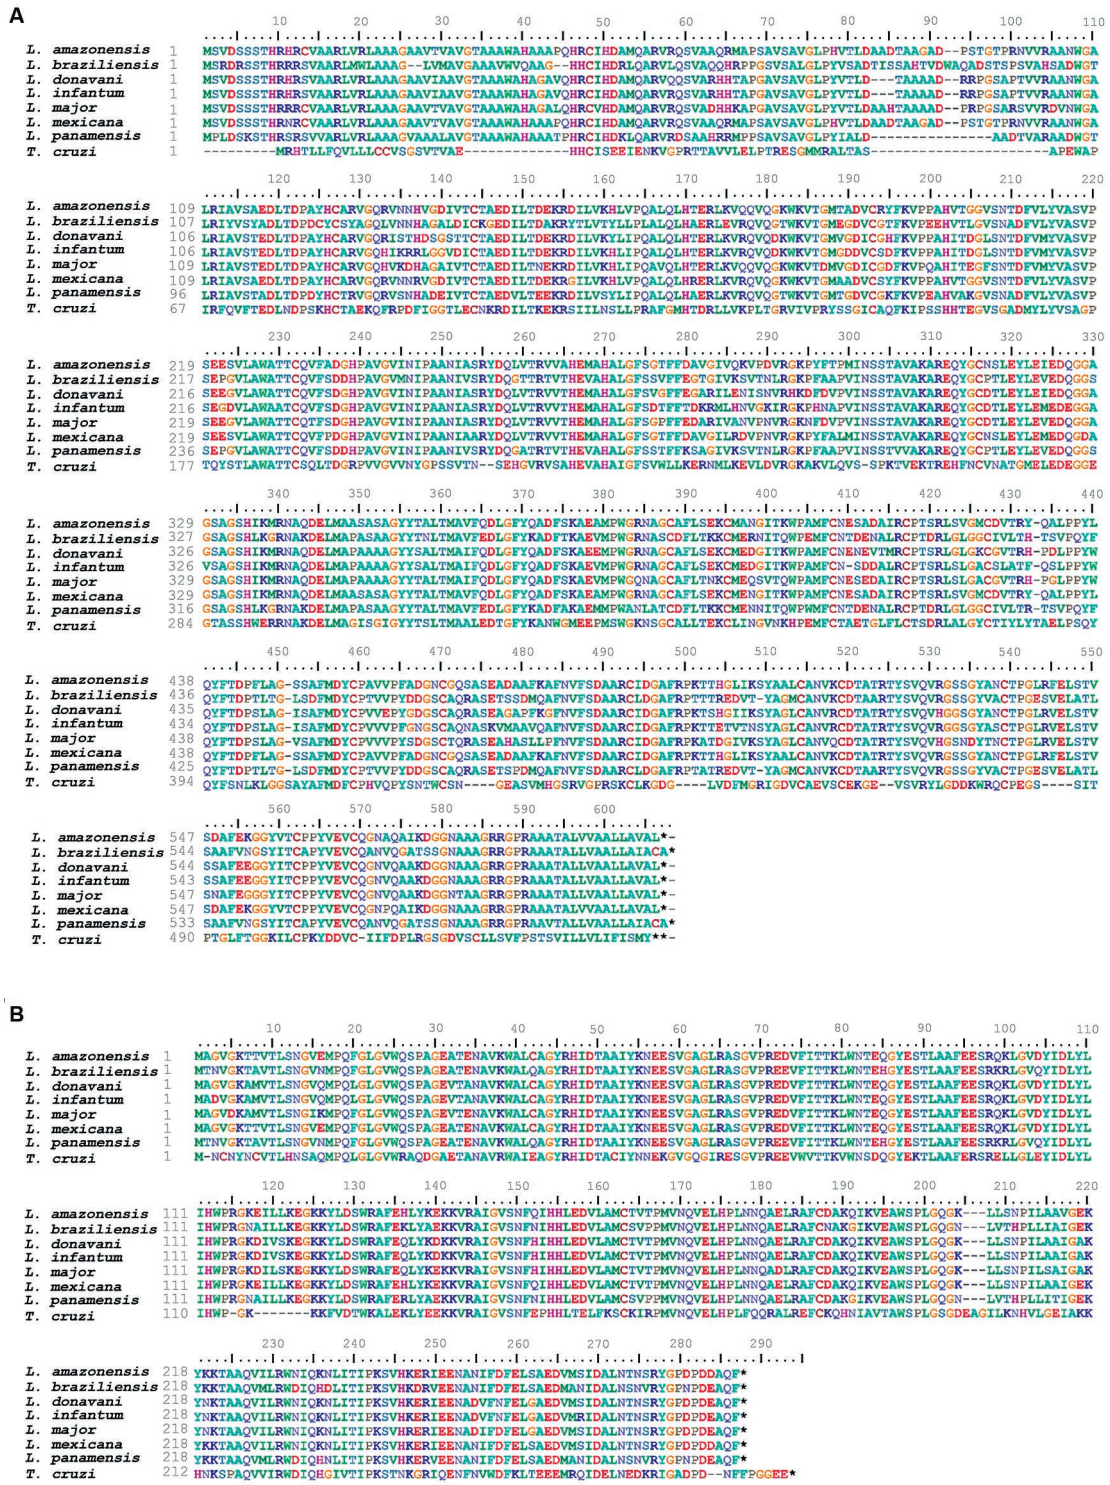

Fig. 3: comparative analysis of the primary structure of GP63 and PGFS proteins across New and Old World *Leishmania* spp. Protein sequences of (A) GP63 or (B) PGFS were aligned using the ClustalW algorithm.



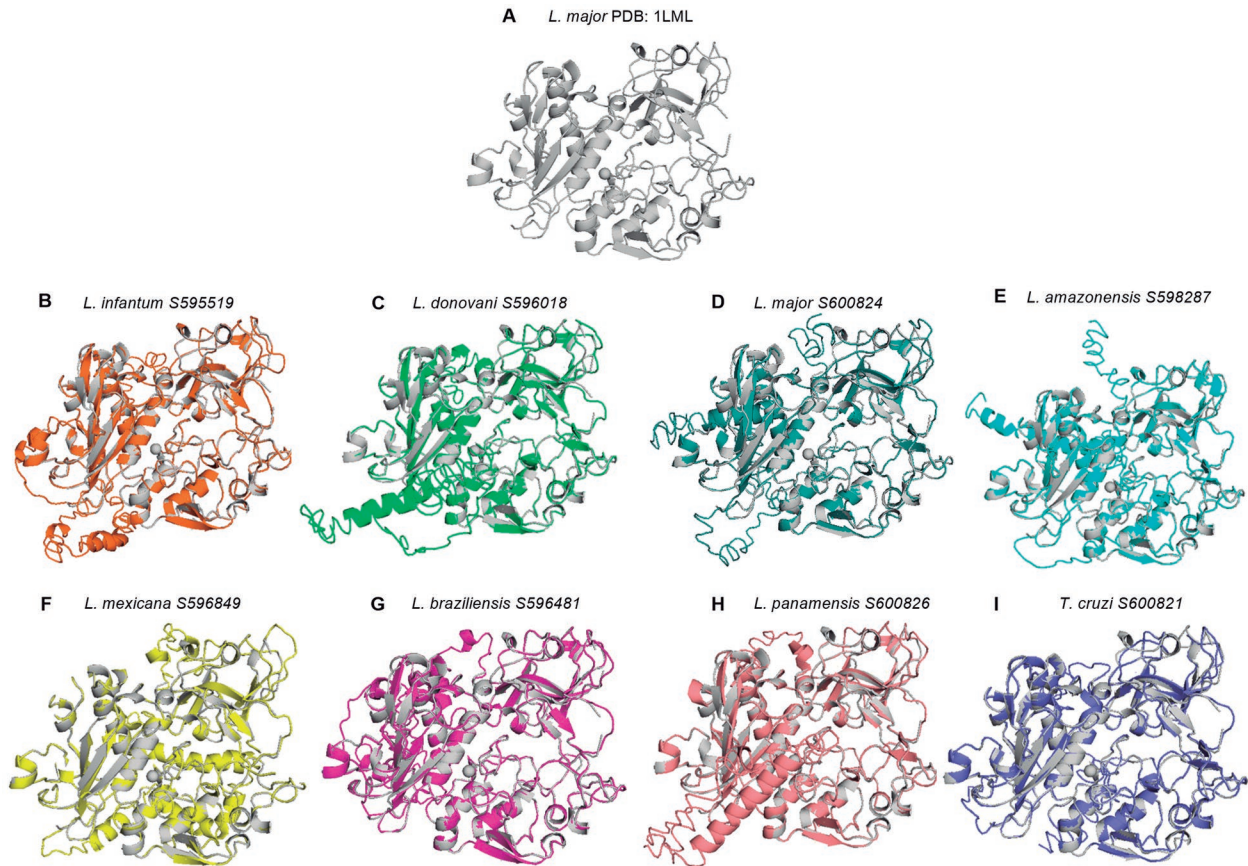

Fig. 4: comparative analysis of the tertiary structure of GP63 protein in *Leishmania* spp. and *Trypanosoma cruzi*. The GP63 protein was modeled using the I-TASSER algorithm and structures were aligned over the *L. major* protein (grey). GP63 tertiary structure overlap shows similarities between (A) *L. major* PDB: 1LML and (B) *L. infantum*, (C) *L. donovani*, (D) *L. major*, (E) *L. amazonensis*, (F) *L. mexicana*, (G) *L. braziliensis*, (H) *L. panamensis* and (I) *T. cruzi*.

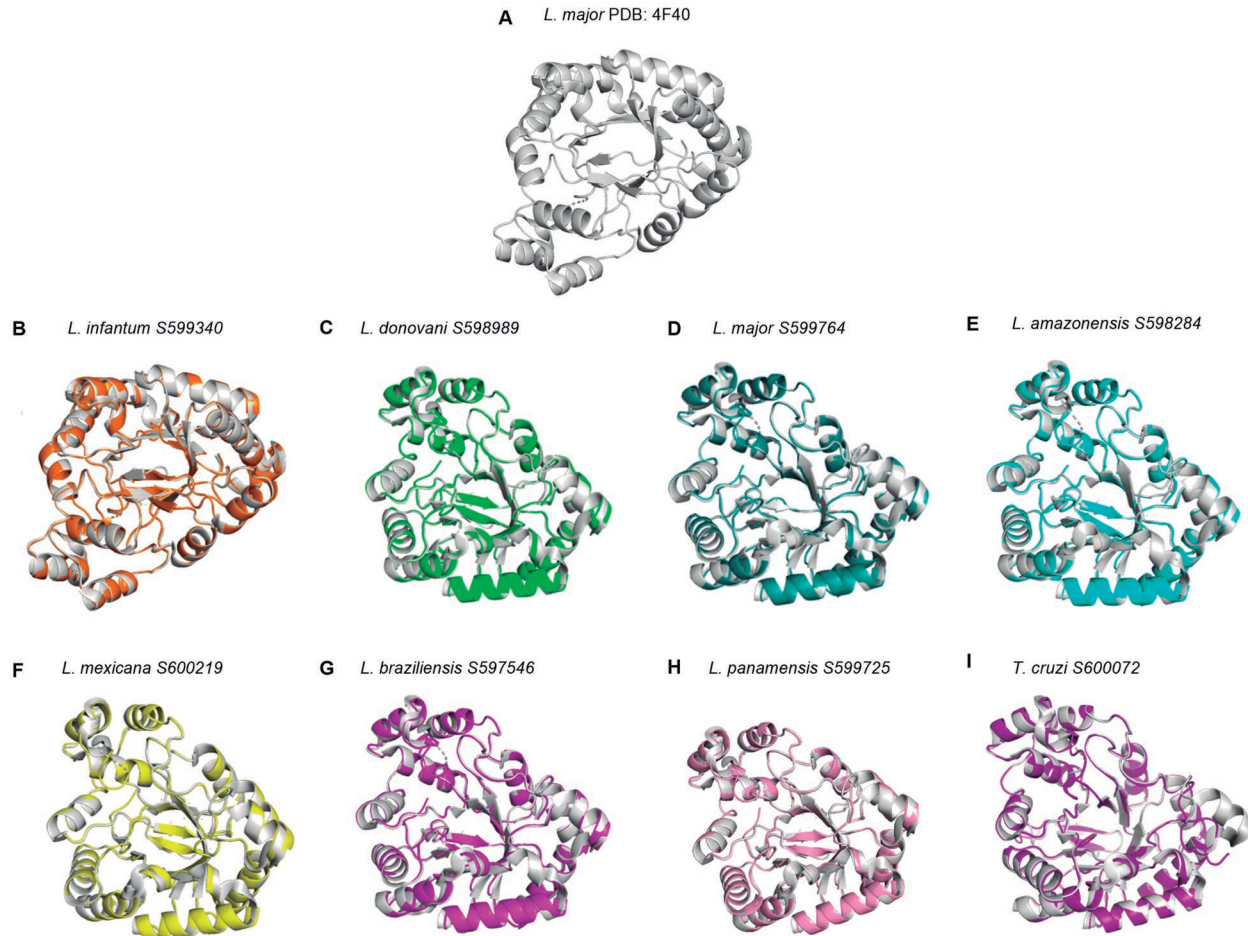

Fig. 5: comparative analysis of the tertiary structure of PGFS protein in *Leishmania* spp. and *Trypanosoma cruzi*. The PGFS protein was modeled using the I-TASSER algorithm and structures were aligned over the *L. major* protein (grey). PGFS tertiary structure overlap shows similarities between (A) *L. major* PDB: 4F40 and (B) *L. infantum*, (C) *L. donovani*, (D) *L. major*, (E) *L. amazonensis*, (F) *L. mexicana*, (G) *L. braziliensis*, (H) *L. panamensis* and (I) *T. cruzi*.

TABLE I  
GP63 nucleotide sequences used in the study

| Species                        | GenBank code   | region (begin - end) | Size (bp) | UniprotKB code |
|--------------------------------|----------------|----------------------|-----------|----------------|
| <i>Leishmania infantum</i>     | FR796442.1     | 222401 - 224197      | 1800      | Q6LA77         |
| <i>Leishmania donovani</i>     | CP029509.1     | 257944 - 259743      | 1800      | A0A3S7WR60     |
| <i>Leishmania major</i>        | Y00647.1       | 199 - 2007           | 1809      | P08148         |
| <i>Leishmania amazonensis</i>  | CP040138.1     | 179953 - 181761      | 1809      | No annotation  |
| <i>Leishmania mexicana</i>     | NC_018314.1    | 180317 - 182125      | 1809      | E9AN54         |
| <i>Leishmania braziliensis</i> | LS997609.1     | 224752 - 226554      | 1803      | A0A3P3YZR7     |
| <i>Leishmania panamensis</i>   | AF037166.1     | 1 - 1770             | 1770      | O46312         |
| <i>Trypanosoma cruzi</i>       | MKQG01002498.1 | 73636 - 75255        | 1630      | No annotation  |

TABLE II  
PGFS nucleotide sequences used in the study

| Species                        | GenBank code   | region (begin - end)* | Size (bp) | UniProtKB code |
|--------------------------------|----------------|-----------------------|-----------|----------------|
| <i>Leishmania infantum</i>     | FR796463.1     | 1034722 - 1035576     | 855       | A4I6Z4         |
| <i>Leishmania donovani</i>     | FR799618.2     | 1062787 - 1063641     | 855       | E9BMZ2         |
| <i>Leishmania major</i>        | FR796427.1     | 1050960 - 1051814     | 855       | P22045         |
| <i>Leishmania amazonensis</i>  | CP040158.1     | 1024015 - 1023161     | 855       | No annotation  |
| <i>Leishmania mexicana</i>     | FR799583.1     | 1026690 - 1027544     | 855       | E9B215         |
| <i>Leishmania braziliensis</i> | FR799006.1     | 1114033 - 1114887     | 855       | A4HJJ7         |
| <i>Leishmania panamensis</i>   | CP009400.1     | 936089 - 936943       | 855       | A0A088RXB1     |
| <i>Trypanosoma cruzi</i>       | AAHK01000429.1 | 11770 - 12618         | 849       | Q4DJ07         |

\*gene identified in the reverse complementary sequence
